# Supplementary material for: Nitrate Leaching Mitigation Options in Two Dairy Pastoral Soils and Climatic Conditions in New Zealand
Source: MDPI journal article supplement (doi:10.3390/plants11182430), 2022-09-17
Supplement: s1 [file s1]

# **Nitrate leaching mitigation options in two dairy pastoral soils under different climatic conditions in New Zealand**

**Dumsane Themba Matse, Paramsothy Jeyakumar\*, Peter Bishop and Christopher W N Anderson**

Environmental Science Group, School of Agriculture and Environment, Massey University, Private

Bag 11 222, Palmerston North 4442, New Zealand

\*Corresponding author: Paramsothy Jeyakumar

Email: [P.Jeyakumar@massey.ac.nz](mailto:P.Jeyakumar@massey.ac.nz); Tel: +6421814545

**Supplementary material (3 Figures and 6 Tables)**

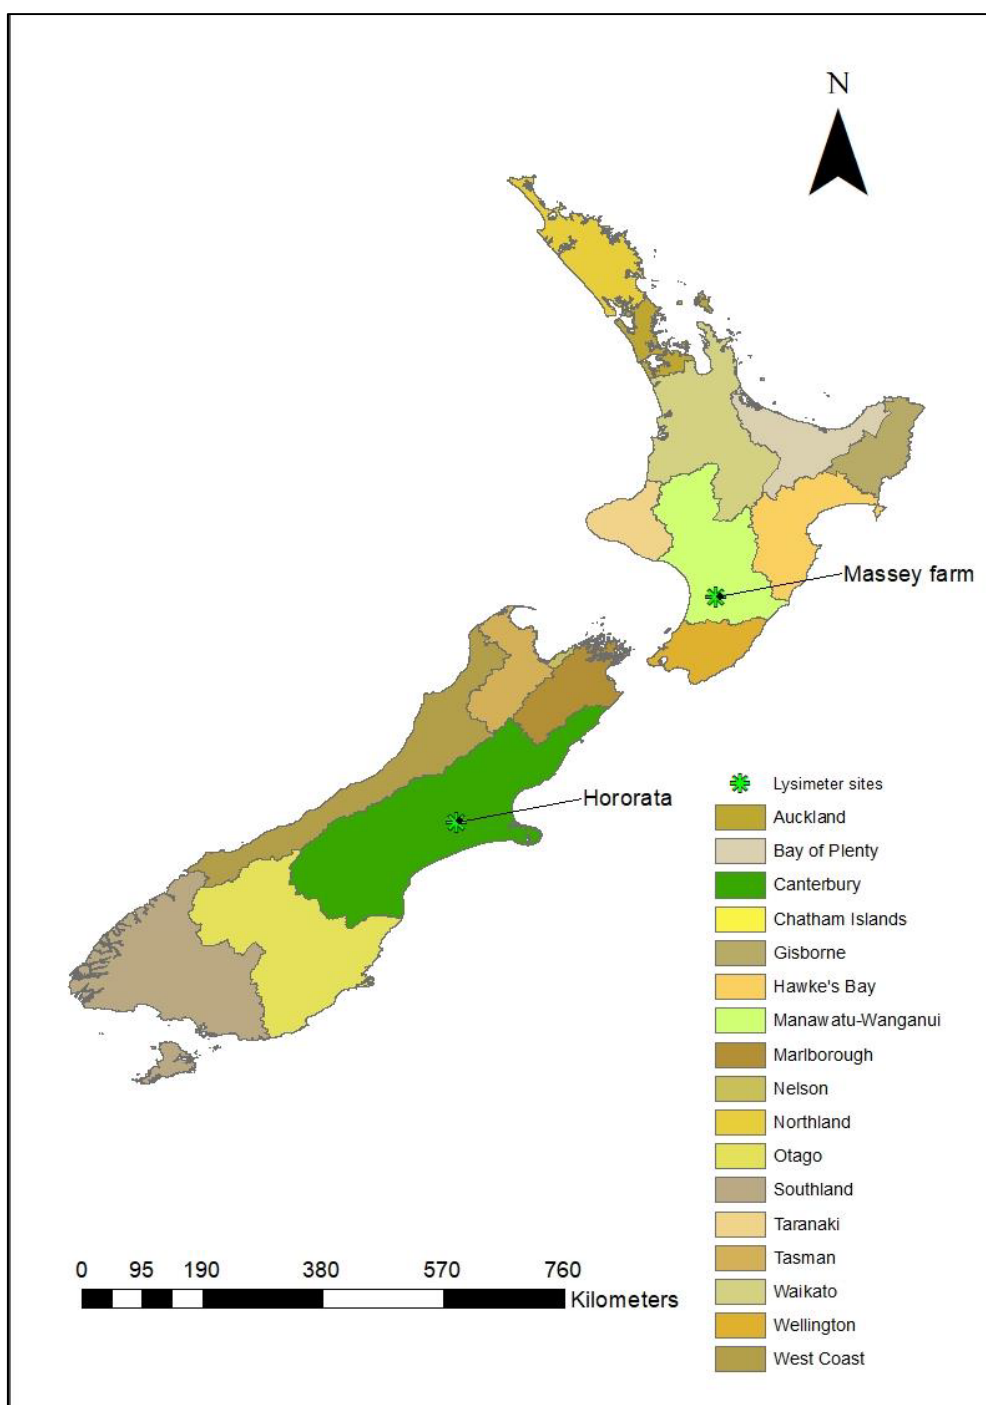

**Figure S1.** Green insert stars show the location of the Lysimeter sites in the South and North Island of New Zealand.

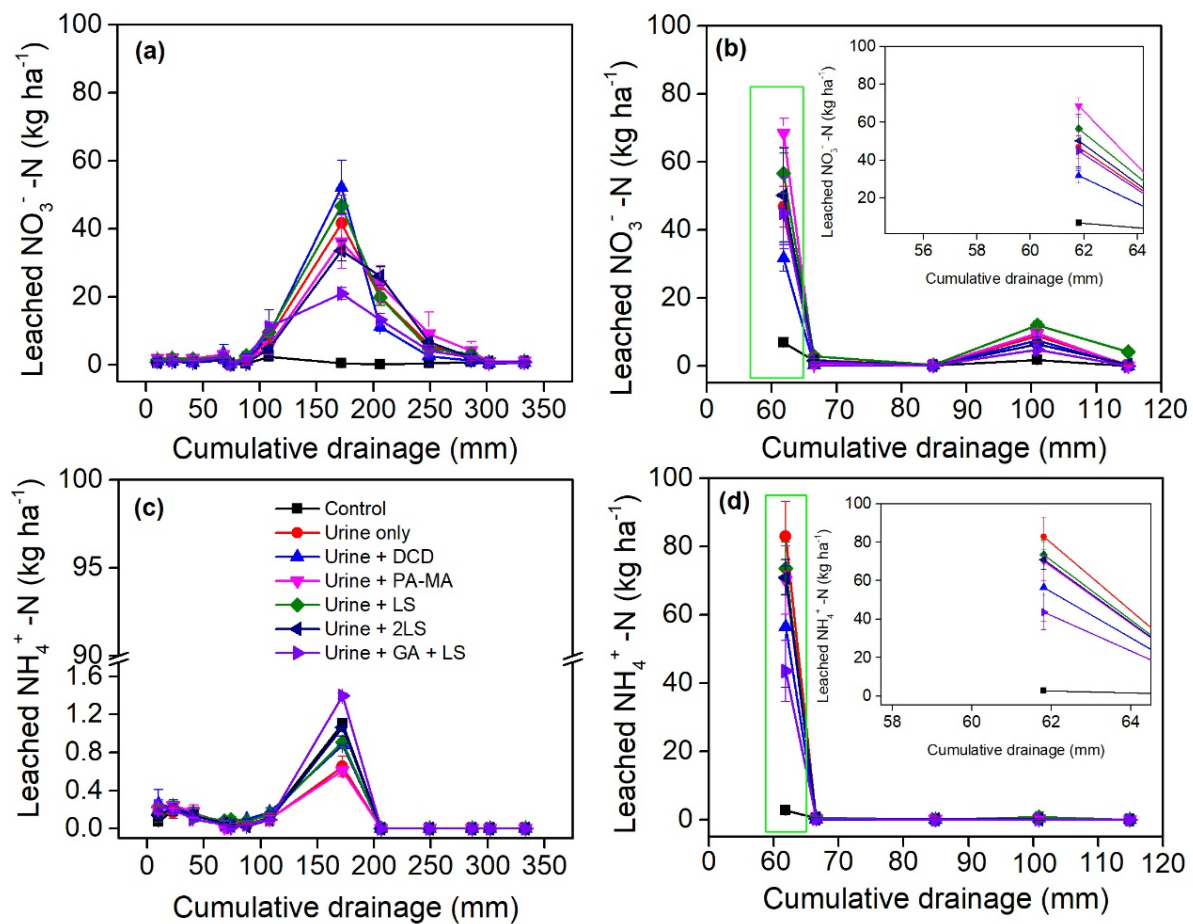

**Figure S2.** Leached  $\text{NO}_3^-$ -N from the Manawatu (a) and Canterbury site (b), and leached  $\text{NH}_4^+$ -N from the Manawatu (c) and Canterbury lysimeters (d) as a function of cumulative drainage following late-autumn urine and treatments application to lysimeters. Error bars represent standard deviation of mean ( $n = 4$ ). Data points for the Canterbury lysimeters start at 61.8 cumulative drainage and correspond to both the maximum and first collected drainage for the late-autumn treatment application.

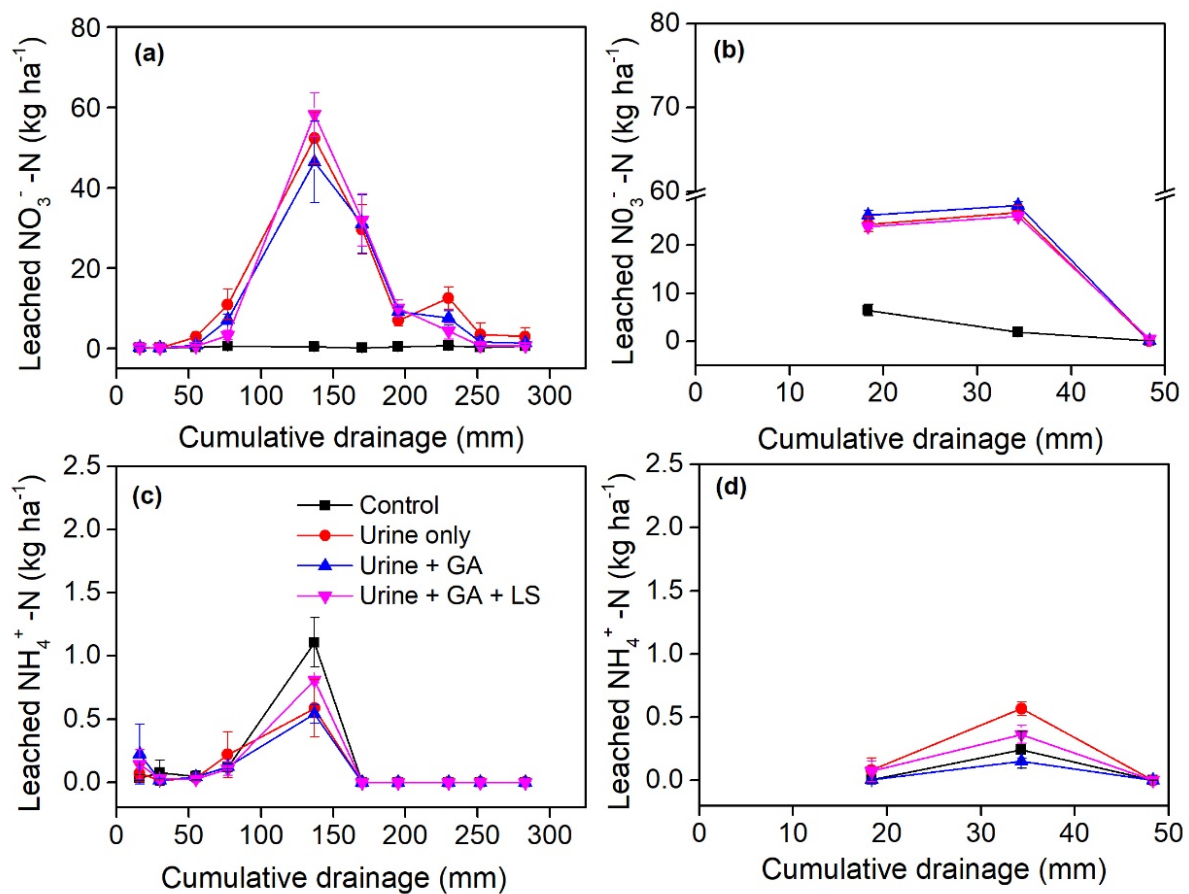

**Figure S3.** Leached NO<sub>3</sub><sup>-</sup>-N from the Manawatu (a) and Canterbury lysimeters (b), and leached NH<sub>4</sub><sup>+</sup>-N from the Manawatu (c) and Canterbury lysimeters (d) as a function of cumulative drainage following mid-winter urine and treatments application to lysimeters. NH<sub>4</sub><sup>+</sup>-N concentration after 150 mm cumulative drainage from the Manawatu lysimeters was below detectable levels. Vertical error bars represent standard deviation of means ( $n = 4$ ). Data points for the Canterbury lysimeters start at 18.4 mm cumulative drainage and correspond to the first collected drainage for the mid-winter treatment application.

**Table S1.** NO<sub>3</sub><sup>-</sup> -N in leachate in the late-autumn treatments application in the Manawatu and Canterbury lysimeters before treatment application.

| Treatments      | Manawatu lysimeters                                             |                                                                 |
|-----------------|-----------------------------------------------------------------|-----------------------------------------------------------------|
|                 | 05/06/2020                                                      | 09/06/202                                                       |
|                 | Leachate<br>kg NO <sub>3</sub> <sup>-</sup> -N ha <sup>-1</sup> | Leachate<br>kg NO <sub>3</sub> <sup>-</sup> -N ha <sup>-1</sup> |
| Control         | 1.0±0.23a                                                       | 1.4±0.75a                                                       |
| Urine only      | 1.4±0.26a                                                       | 1.5±0.39a                                                       |
| Urine + DCD     | 1.1±0.37a                                                       | 1.5±0.09a                                                       |
| Urine + PA-MA   | 1.6±0.90a                                                       | 1.1±0.44a                                                       |
| Urine + LS      | 1.3±0.29a                                                       | 1.4±0.73a                                                       |
| Urine + 2LS     | 2.0±0.69a                                                       | 1.2±0.69a                                                       |
| Urine + GA + LS | 0.9±0.27a                                                       | 0.9±0.19a                                                       |
| Treatments      | Canterbury lysimeters                                           |                                                                 |
|                 | 13/05/2020                                                      | 20/05/2020                                                      |
|                 | Leachate<br>kg NO <sub>3</sub> <sup>-</sup> -N ha <sup>-1</sup> | Leachate<br>kg NO <sub>3</sub> <sup>-</sup> -N ha <sup>-1</sup> |
| Control         | 8.5±2.37a                                                       | 1.0±0.23                                                        |
| Urine only      | 9.7±1.46a                                                       | 1.4±0.26                                                        |
| Urine + DCD     | 9.4±1.38a                                                       | 1.6±1.33                                                        |
| Urine + PA-MA   | 11.3±1.91a                                                      | 1.6±0.90                                                        |
| Urine + LS      | 9.4±1.73a                                                       | 1.5±0.61                                                        |
| Urine + 2LS     | 9.6±1.73a                                                       | 1.9±0.69                                                        |
| Urine + GA + LS | 8.7±1.15a                                                       | 1.0±0.74                                                        |

Values after ±represent standard deviation. Different small letters in each soil column indicate significant difference at  $P < 0.05$ . NH<sub>4</sub><sup>+</sup> -N was below detectable concentrations.

**Table S2.** NO<sub>3</sub><sup>-</sup> -N in leachate in the mid-winter treatments application in the Manawatu and Canterbury lysimeters before treatments application.

| Treatments      | Manawatu lysimeters                                             |                                                                 |
|-----------------|-----------------------------------------------------------------|-----------------------------------------------------------------|
|                 | 05/06/2020                                                      | 09/06/202                                                       |
|                 | Leachate<br>kg NO <sub>3</sub> <sup>-</sup> -N ha <sup>-1</sup> | Leachate<br>kg NO <sub>3</sub> <sup>-</sup> -N ha <sup>-1</sup> |
| Control         | 1.2±0.21a                                                       | 1.0±0.30a                                                       |
| Urine only      | 0.9±0.52a                                                       | 1.0±0.20a                                                       |
| Urine + GA      | 1.4±0.93a                                                       | 1.2±0.18a                                                       |
| Urine + GA + LS | 1.3±0.90a                                                       | 1.0±0.58a                                                       |
| Treatments      | Canterbury lysimeters                                           |                                                                 |
|                 | 13/05/2020                                                      | 20/05/2020                                                      |
|                 | Leachate<br>kg NO <sub>3</sub> <sup>-</sup> -N ha <sup>-1</sup> | Leachate<br>kg NO <sub>3</sub> <sup>-</sup> -N ha <sup>-1</sup> |
| Control         | 10.1±1.04a                                                      | 0.9±0.60a                                                       |
| Urine only      | 11.2±1.55a                                                      | 1.0±0.42a                                                       |
| Urine + GA      | 10.9±1.06a                                                      | 0.9±0.50a                                                       |
| Urine + GA + LS | 9.7±0.35a                                                       | 1.3±0.90a                                                       |

Values after ± represent standard deviation. Different small letters in each soil column indicate significant difference at  $P < 0.05$ . NH<sub>4</sub><sup>+</sup> -N was below detectable concentrations.

**Table S3.** Soil NO<sub>3</sub><sup>-</sup>-N, NH<sub>4</sub><sup>+</sup>-N, and soil total mineral N analysed at the end of the experiment following late-autumn treatment application in the Manawatu and Canterbury lysimeters.

| Treatments      | Manawatu lysimeters                                       |                                                           |                                             |
|-----------------|-----------------------------------------------------------|-----------------------------------------------------------|---------------------------------------------|
|                 | NO <sub>3</sub> <sup>-</sup> -N<br>(kg ha <sup>-1</sup> ) | NH <sub>4</sub> <sup>+</sup> -N<br>(kg ha <sup>-1</sup> ) | Total mineral N<br>(kg N ha <sup>-1</sup> ) |
| Control         | 15.8±1.6a                                                 | 0.13±0.02b                                                | 16.0±1.6a                                   |
| Urine only      | 16.2±2.7a                                                 | 0.13±0.03ab                                               | 16.3±2.7a                                   |
| Urine + DCD     | 18.6±3.9a                                                 | 0.18±0.01a                                                | 18.7±3.9a                                   |
| Urine + PA-MA   | 16.9±3.3a                                                 | 0.14±0.02ab                                               | 17.1±3.3a                                   |
| Urine + LS      | 14.3±2.0a                                                 | 0.15±0.02ab                                               | 14.4±2.0a                                   |
| Urine + 2LS     | 12.7±1.0a                                                 | 0.18±0.02a                                                | 12.9±1.0a                                   |
| Urine + GA + LS | 16.6±3.0a                                                 | 0.13±0.04ab                                               | 16.7±3.0a                                   |
| Treatments      | Canterbury lysimeters                                     |                                                           |                                             |
|                 | NO <sub>3</sub> <sup>-</sup> -N<br>(kg ha <sup>-1</sup> ) | NH <sub>4</sub> <sup>+</sup> -N<br>(kg ha <sup>-1</sup> ) | Total Mineral N<br>(kg N ha <sup>-1</sup> ) |
| Control         | 17.4±3.7b                                                 | 11.4±1.7a                                                 | 28.8±4.3b                                   |
| Urine only      | 31.7±5.8ab                                                | 3.8±0.7bc                                                 | 35.5±6.4ab                                  |
| Urine + DCD     | 29.1±3.7ab                                                | 3.1±0.5c                                                  | 32.2±2.5b                                   |
| Urine + PA-MA   | 35.3±4.8a                                                 | 5.4±1.2b                                                  | 40.7±1.9ab                                  |
| Urine + LS      | 31.9±5.4ab                                                | 9.6±0.4c                                                  | 34.6±6.1b                                   |
| Urine + 2LS     | 40.6±10.4a                                                | 9.6±1.0a                                                  | 50.2±10.5a                                  |
| Urine + GA + LS | 36.3±8.9a                                                 | 2.8±0.9c                                                  | 39.2±8.7ab                                  |

Numbers after ± represent standard deviation. Different small letters in each column of each soil indicate significant difference at  $P < 0.05$ .

**Table S4.** Soil NO<sub>3</sub><sup>-</sup>-N, NH<sub>4</sub><sup>+</sup>-N, and soil total mineral N analysed at the end of the experiment following mid-winter treatment application in the Manawatu and Canterbury lysimeters.

| Treatments      | Manawatu lysimeters                                       |                                                           |                                             |
|-----------------|-----------------------------------------------------------|-----------------------------------------------------------|---------------------------------------------|
|                 | NO <sub>3</sub> <sup>-</sup> -N<br>(kg ha <sup>-1</sup> ) | NH <sub>4</sub> <sup>+</sup> -N<br>(kg ha <sup>-1</sup> ) | Total mineral N<br>(kg N ha <sup>-1</sup> ) |
| Control         | 15.8±1.6b                                                 | 1.1±0.1a                                                  | 16.9±1.5b                                   |
| Urine only      | 14.0±2.9b                                                 | 0.7±0.1b                                                  | 14.8±2.9b                                   |
| Urine + GA      | 18.2±2.6ab                                                | 1.1±0.2a                                                  | 19.3±2.5ab                                  |
| Urine + GA + LS | 22.7±4.0a                                                 | 1.3±0.1a                                                  | 24.0±3.9a                                   |
| Treatments      | Canterbury lysimeters                                     |                                                           |                                             |
|                 | NO <sub>3</sub> <sup>-</sup> -N<br>(kg ha <sup>-1</sup> ) | NH <sub>4</sub> <sup>+</sup> -N<br>(kg ha <sup>-1</sup> ) | Total Mineral N<br>(kg N ha <sup>-1</sup> ) |
| Control         | 17.4±3.1b                                                 | 11.4±1.7a                                                 | 28.8±4.3a                                   |
| Urine only      | 58.0±4.5a                                                 | 4.9±1.2b                                                  | 62.9±5.6b                                   |
| Urine + GA      | 49.1±8.0a                                                 | 4.3±1.2b                                                  | 53.4±9.0b                                   |
| Urine + GA + LS | 54.1±6.2a                                                 | 5.9±0.8b                                                  | 60.0±7.0b                                   |

Numbers after ± represent standard deviation. Different small letters in each column of each soil indicate significant difference at  $P < 0.05$ .

**Table S5.** Herbage N uptake (kg N/ha) and herbage DM yield (kg DM/ha), following late-autumn urine and treatment application to the Manawatu and Canterbury site

| <b>Manawatu site</b>   |          |          |          |          |          |          |          |          |          |          |
|------------------------|----------|----------|----------|----------|----------|----------|----------|----------|----------|----------|
| Treatments             | 11/07/20 |          | 11/09/20 |          | 10/10/20 |          | 11/11/20 |          | 11/12/20 |          |
|                        | kg N/ha  | kg DM/ha |
| Control                | 2.7d     | 91e      | 1.8d     | 121b     | 11.6c    | 538d     | 11.0a    | 772b     | 21.4a    | 1262b    |
| Urine only             | 11.6c    | 266d     | 95.2b    | 3062a    | 66.8b    | 2663c    | 31.7ab   | 1968a    | 24.6a    | 1520a    |
| Urine + DCD            | 16.8b    | 373b     | 95.3b    | 3303a    | 79.5ab   | 2815bc   | 35.7a    | 2088a    | 27.4a    | 1697a    |
| Urine + PA-MA          | 11.7c    | 274dc    | 62.9c    | 3196a    | 76.2ab   | 3067ab   | 28.9b    | 1888a    | 24.5a    | 1515a    |
| Urine + LS             | 13.9c    | 320c     | 67.6c    | 2857a    | 72.8ab   | 2614c    | 32.2ab   | 1975a    | 26.7a    | 1708a    |
| Urine + 2LS            | 16.9b    | 385b     | 101.8b   | 3190a    | 85.4a    | 3276a    | 28.7b    | 1860a    | 25.3a    | 1590a    |
| Urine + GA + LS        | 21.3a    | 505a     | 114.9a   | 2993a    | 68.5b    | 2527c    | 30.8ab   | 1897a    | 25.6a    | 1661a    |
| <b>Canterbury site</b> |          |          |          |          |          |          |          |          |          |          |
| Treatments             | 27/08/20 |          | 17/10/20 |          | 19/11/20 |          | 16/12/20 |          |          |          |
|                        | kg N/ha  | kg DM/ha |
| Control                |          | 11.4c    | 454d     | 27.1c    | 1002b    | 36.8b    | 2212b    | 18.0d    | 777b     |          |
| Urine only             |          | 76.8a    | 1964ab   | 74.6b    | 3122a    | 91.9a    | 3798a    | 37.6c    | 1221a    |          |
| Urine + DCD            |          | 80.80a   | 2125a    | 93.7a    | 3098a    | 103.4a   | 4114a    | 46.9b    | 1634a    |          |
| Urine + PA-MA          |          | 61.8b    | 1693abc  | 88.8a    | 2934a    | 94.4a    | 4275a    | 41.6bc   | 1321a    |          |
| Urine + LS             |          | 54.8b    | 1450bc   | 95.9a    | 3013a    | 102.4a   | 4483a    | 55.0a    | 1650a    |          |
| Urine + 2LS            |          | 56.7b    | 1276c    | 96.4a    | 3731a    | 116.6a   | 4445a    | 42.2bc   | 1440a    |          |
| Urine + GA + LS        |          | 80.7a    | 2144a    | 89.1a    | 3161a    | 101.8a   | 4541a    | 42.8bc   | 1441a    |          |

Values in each column, followed by different small letters within a column for each soil, are significantly different at  $P < 0.05$ .

**Table S6.** Herbage N uptake (kg N/ha) and herbage DM yield (kg DM/ha) following mid-winter urine and treatment application to the Manawatu and Canterbury site.

| <b>Manawatu site</b>   |          |          |          |          |          |          |          |          |
|------------------------|----------|----------|----------|----------|----------|----------|----------|----------|
| Treatments             | 11/09/20 |          | 10/10/20 |          | 11/11/20 |          | 10/12/20 |          |
|                        | kg N/ha  | kg DM/ha |
| Control                | 1.8c     | 121c     | 11.6c    | 538b     | 11.0b    | 772c     | 21.4a    | 1262b    |
| Urine only             | 33.6b    | 867b     | 94.5a    | 2986a    | 47.4a    | 2682b    | 25.6a    | 1527a    |
| Urine + GA             | 57.2a    | 1554a    | 102.5a   | 3037a    | 57.8a    | 3157a    | 28.4a    | 1771a    |
| Urine + GA + LS        | 52.6a    | 1428a    | 96.8a    | 3031a    | 52.5a    | 3107a    | 25.3a    | 1704a    |
| <b>Canterbury site</b> |          |          |          |          |          |          |          |          |
| Treatments             | 17/10/20 |          | 16/11/20 |          | 16/12/20 |          |          |          |
|                        | kg N/ha  | kg DM/ha |
| Control                | 27.1c    | 1002b    | 36.8c    | 2212c    | 18.0c    | 777c     |          |          |
| Urine only             | 125.6b   | 3675a    | 87.6b    | 3968b    | 58.3b    | 1762b    |          |          |
| Urine + GA             | 119.7b   | 3667a    | 130.6a   | 4802a    | 71.5a    | 2040a    |          |          |
| Urine + GA + LS        | 139.3a   | 4032a    | 124.3a   | 5123a    | 72.4a    | 1993a    |          |          |

Values in each column, followed by different small letters within a column for each soil, are significantly different at  $P < 0.05$ .
